# Supplementary material for: Role of Arginase-II in Podocyte Injury under Hypoxic Conditions
Source: MDPI journal article supplement (doi:10.3390/biom12091213), 2022-08-31
Supplement: s1 [file s1]

### **Suppl. Video File Legend**

A representative Z-stack recording showing co-localization of Arg-II (green) and synaptopodin (SNPT, red) in glomerulus of aged wild type mice under hypoxic conditions. White arrow indicates podocytes co-expressing both Arg-II and SNPT. Nucleoli were stained with DAPI (blue).
