# Supplementary material for: Role of Arginase-II in Podocyte Injury under Hypoxic Conditions
Source: MDPI journal article supplement (doi:10.3390/biom12091213), 2022-08-31
Supplement: s1 [file s1]

**Supplementary Table S1. Antibody dilutions used for immunoblotting and immunofluorescence**

| <b>Antibody target</b>                                             | <b>Dilution</b>          |
|--------------------------------------------------------------------|--------------------------|
| HIF1 $\alpha$ (610958, BD Transduction Laboratories)               | WB 1:1,000               |
| HIF2 $\alpha$ (PAB12124, Abnova)                                   | WB 1:1'000               |
| Arg-II (cell signaling, 55003)                                     | WB 1:1'000;<br>IF: 1:100 |
| ACE1 (sc-23908, Santa Cruz)                                        | IF: 1:50                 |
| $\beta$ -actin (A5441, Sigma-Aldrich)                              | WB 1:10'000              |
| Tubulin (T5168, Sigma-Aldrich)                                     | WB 1:15'000              |
| Podocin (PA5-37284, Invitrogen / Thermo Fisher Scientific)         | WB 1:1'000               |
| Synaptopodin (sc-515842, Santa Cruz)                               | WB: 1:100<br>IF: 1:100   |
| IRDye 800-conjugated affinity purified goat anti-rabbit IgG        | WB 1:5,000               |
| Alexa fluor 680-conjugated goat anti-mouse IgG                     | WB 1:5,000               |
| Alexa Fluor 488-conjugated goat anti-rabbit IgG (H+L) secondary Ab | IF 1:400                 |
| Alexa Fluor 488-conjugated goat anti-mouse IgG (H+L) secondary Ab  | IF 1:400                 |
| Alexa Fluor 568-conjugated goat anti-mouse IgG (H+L) secondary Ab  | IF 1:400                 |
