# Supplementary material for: Role of Arginase-II in Podocyte Injury under Hypoxic Conditions
Source: MDPI journal article supplement (doi:10.3390/biom12091213), 2022-08-31

## Original blots for Fig. 1

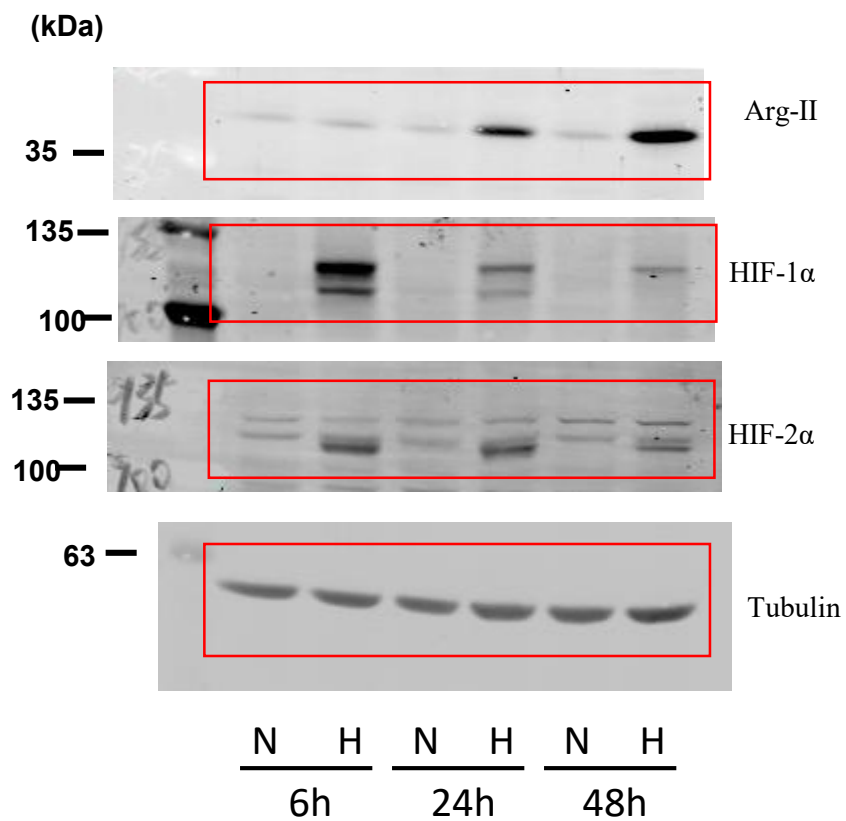

N= normoxia

H= hypoxia

## Original blots for Fig. 2

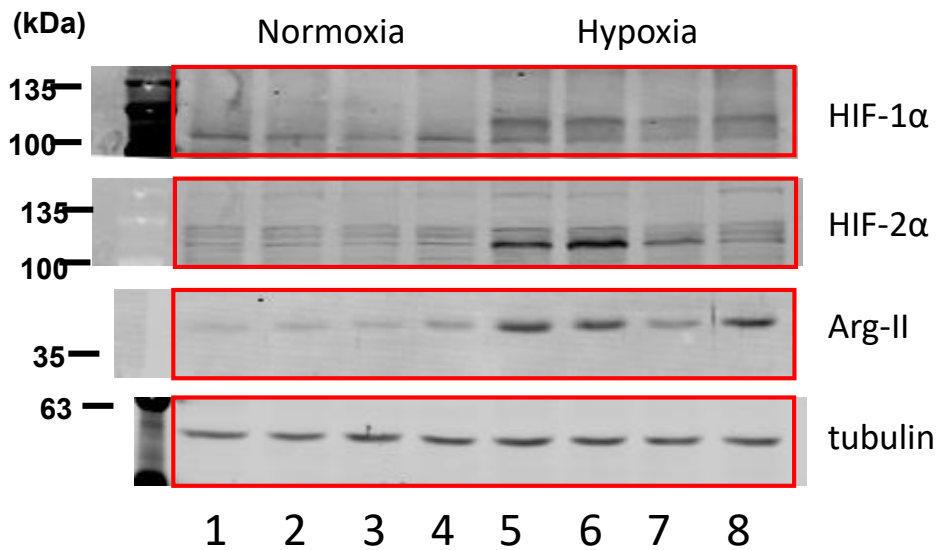

1. Normoxia without virus (-)
2. Normoxia with shRNA-LacZ
3. Normoxia with shRNA-HIF1 $\alpha$
4. Normoxia with shRNA-HIF2 $\alpha$

5. hypoxia without virus (-)
6. hypoxia with shRNA-LacZ
7. Hypoxia with shRNA-HIF1 $\alpha$
8. hypoxia with shRNA-HIF2 $\alpha$

# Original blots for Fig. 3

**A**

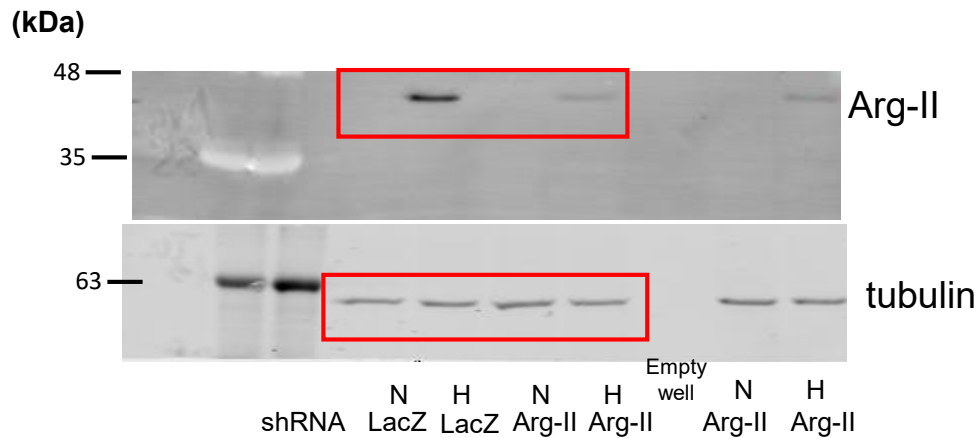

**C**

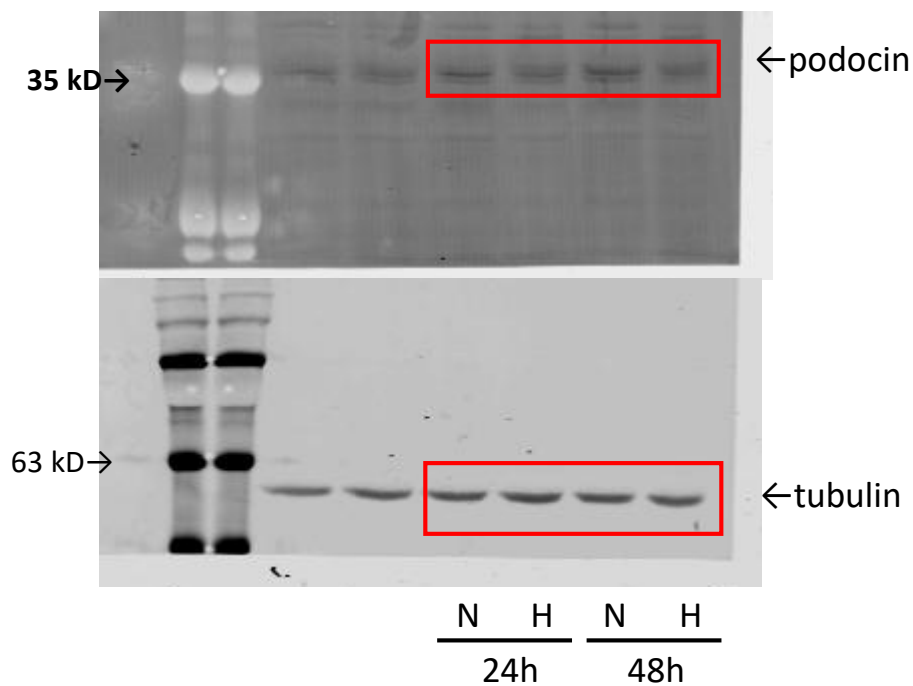

**D**

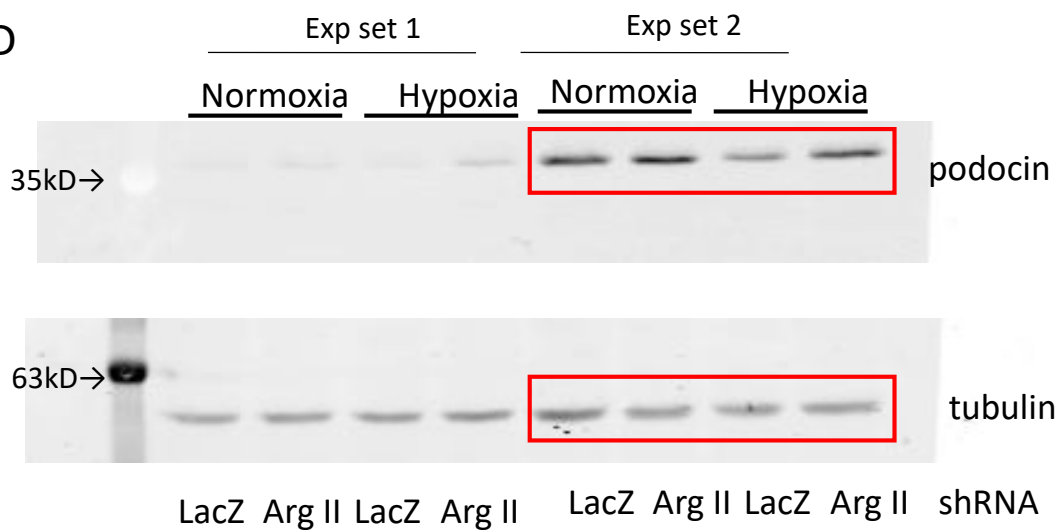

Original blots for Fig. 5

E

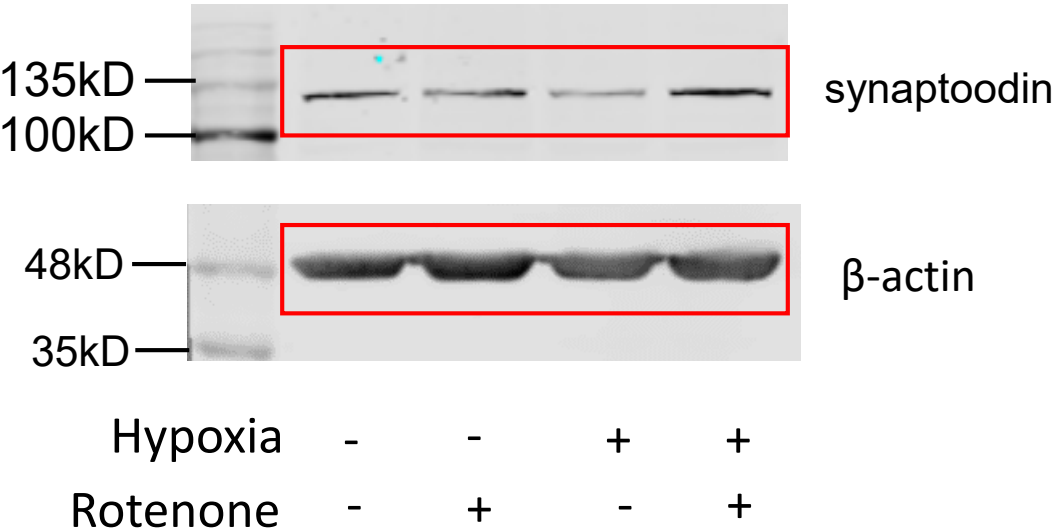

**Fig. 7**

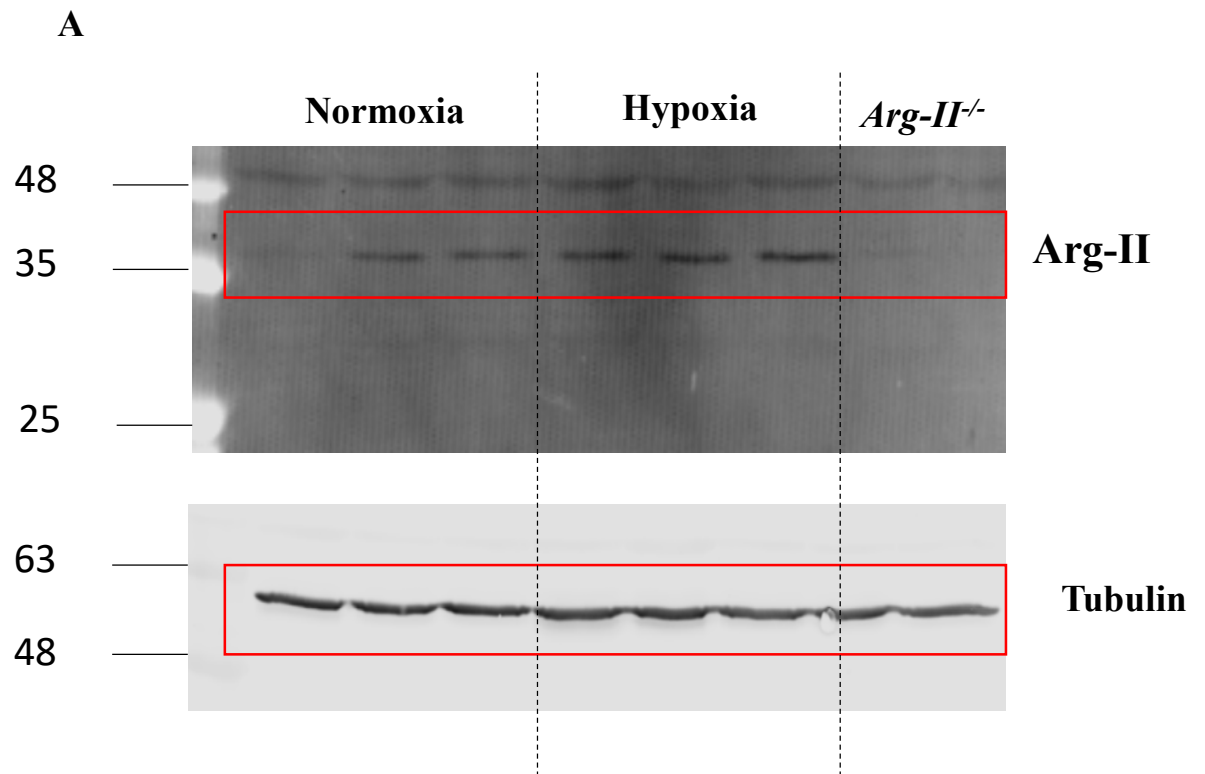

## Original blot for Suppl. Fig. 1

A

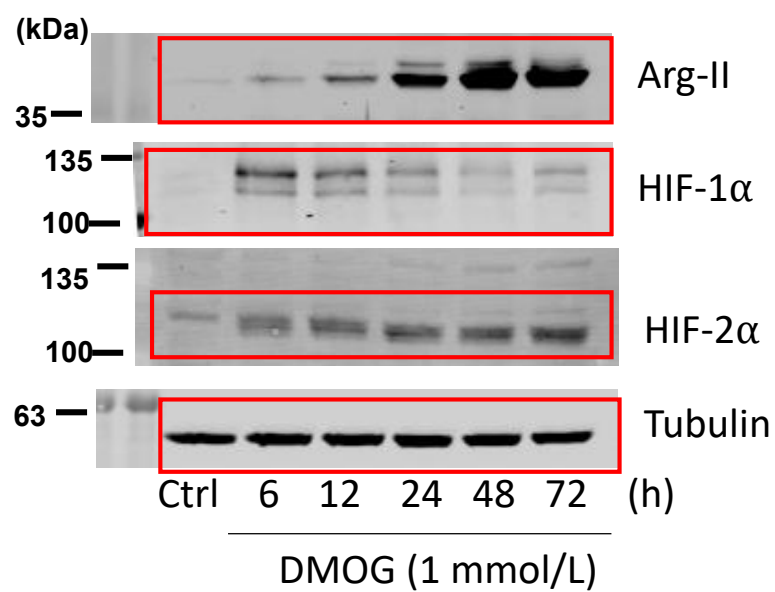

## Original blot for Suppl. Fig. 5

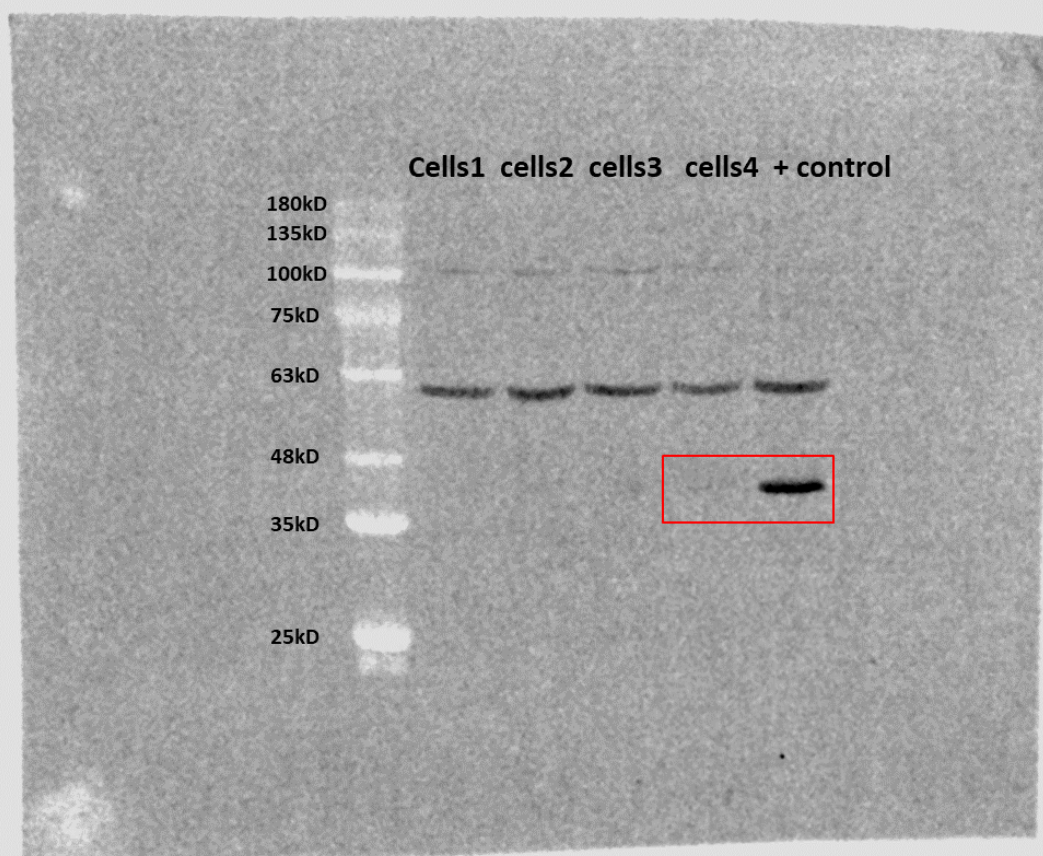

Supplement: s1 [file s1]
