# Supplementary material for: Role of Arginase-II in Podocyte Injury under Hypoxic Conditions
Source: Biomolecules. 2022 Aug 31;12(9):1213. doi: 10.3390/biom12091213 (PMC9496188; doi:10.3390/biom12091213)
Supplement: Supplementary file 1 [file biomolecules-12-01213-s001.zip]

Archive with 12 entries (12 files):
- Legend to Suppl. Video Files_Final.pdf
- Original blots-Final.pdf
- Suppl. Fig. Legends_Final.pdf
- Suppl. Figure S1.pdf
- Suppl. Figure S2.pdf
- Suppl. Figure S3.pdf
- Suppl. Figure S4.pdf
- Suppl. Figure S5.pdf
- Suppl. Figure S6.pdf
- Suppl. Figure S7.pdf
- Supplemental Table S1_Final.pdf
- video S1.avi
