# Supplementary figures and images for: Role of Arginase-II in Podocyte Injury under Hypoxic Conditions
Source: MDPI journal article supplement (doi:10.3390/biom12091213), 2022-08-31

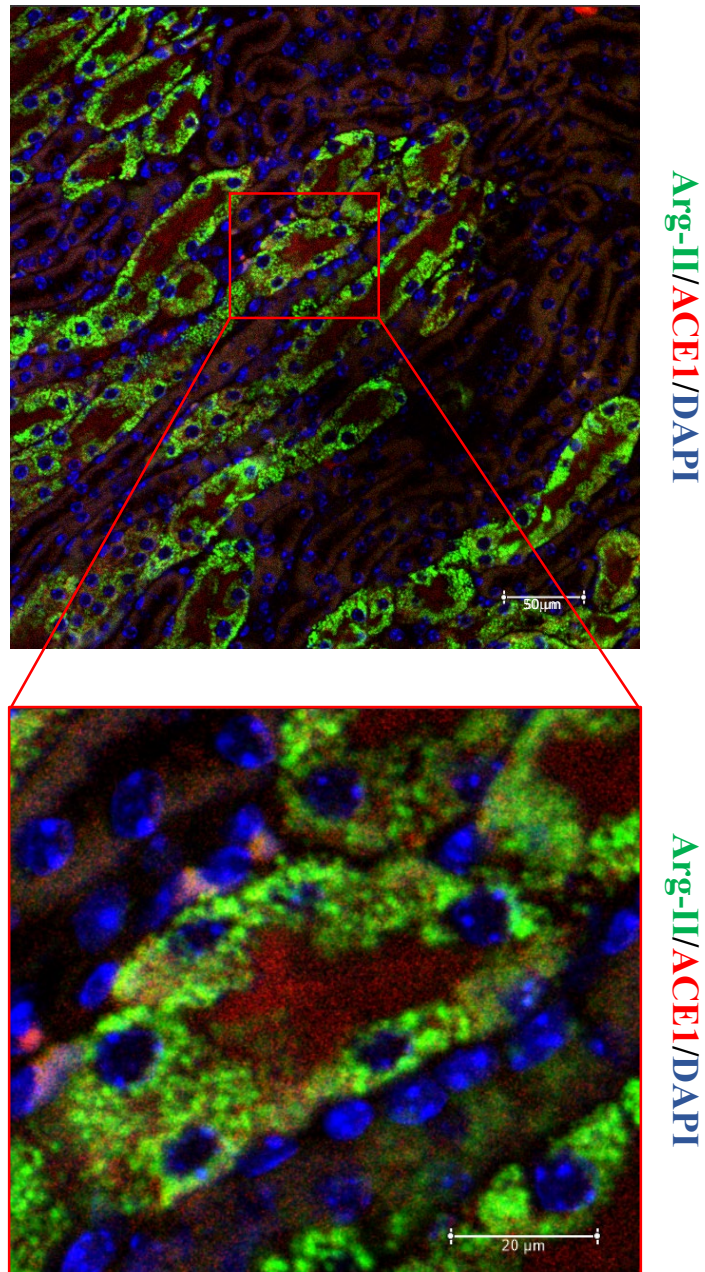

***wt* - Old (Hypoxia)**

**Suppl. Figure S6**

Supplement: s1 [file s1]

**A**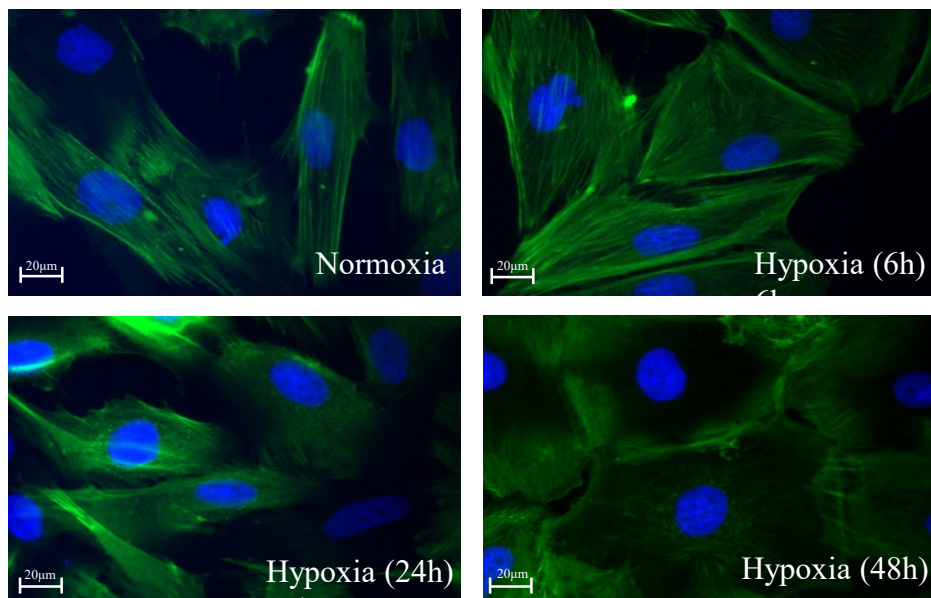**B**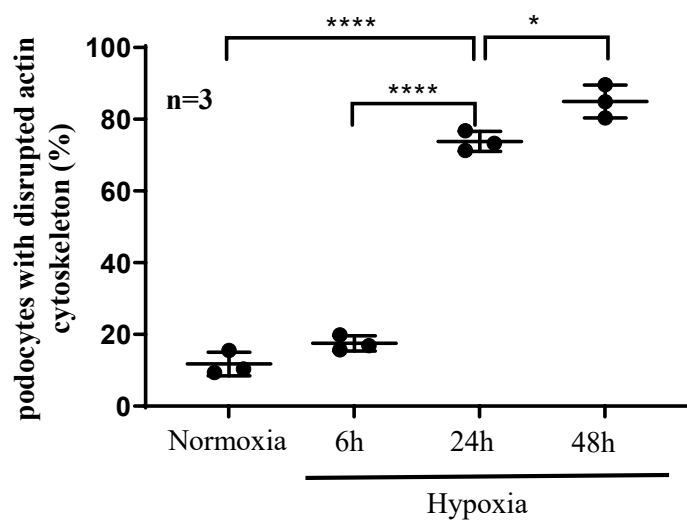

Suppl. Figure S2

Supplement: s1 [file s1]

**A**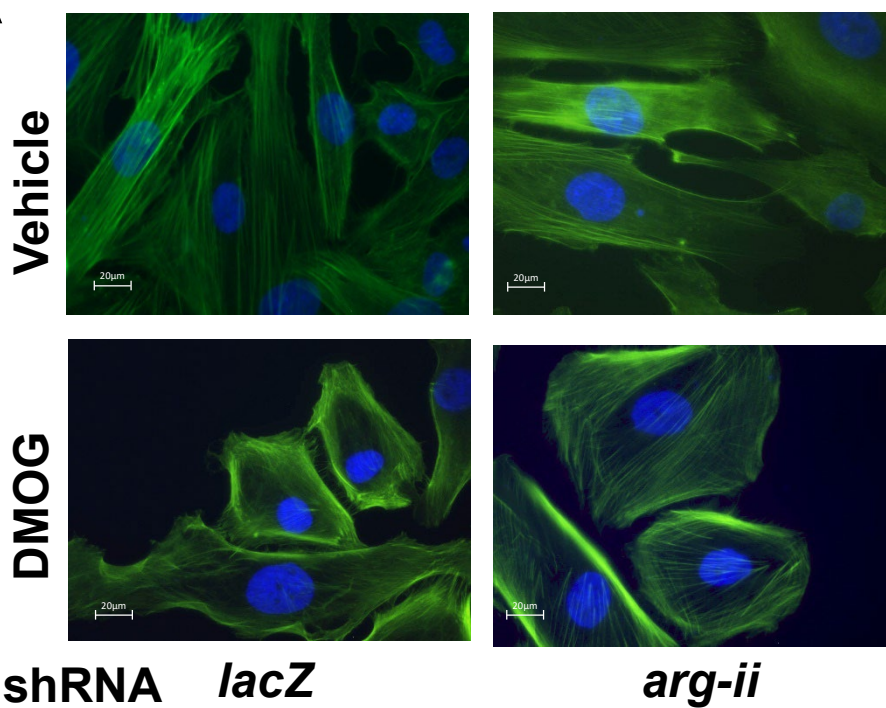**B**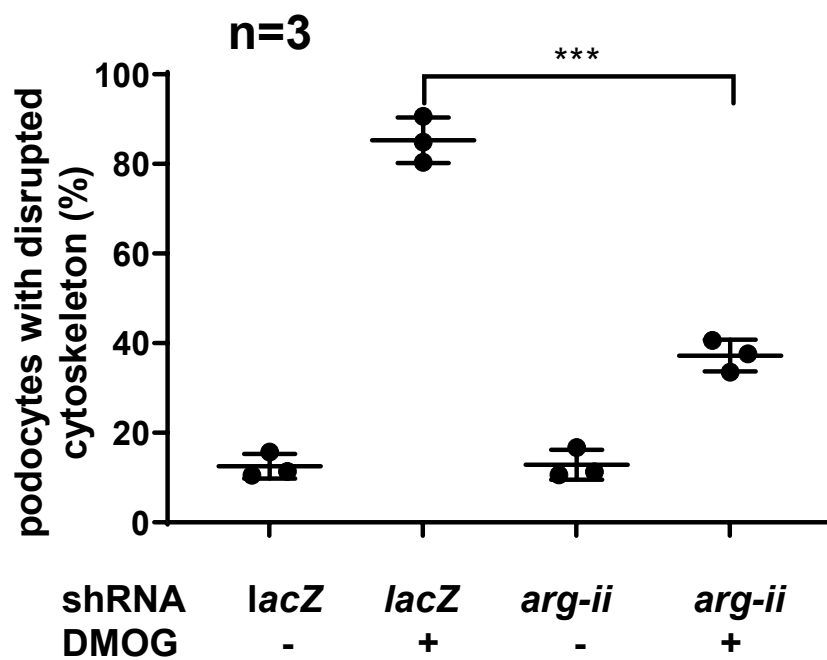

Suppl. Figure S3

Supplement: s1 [file s1]

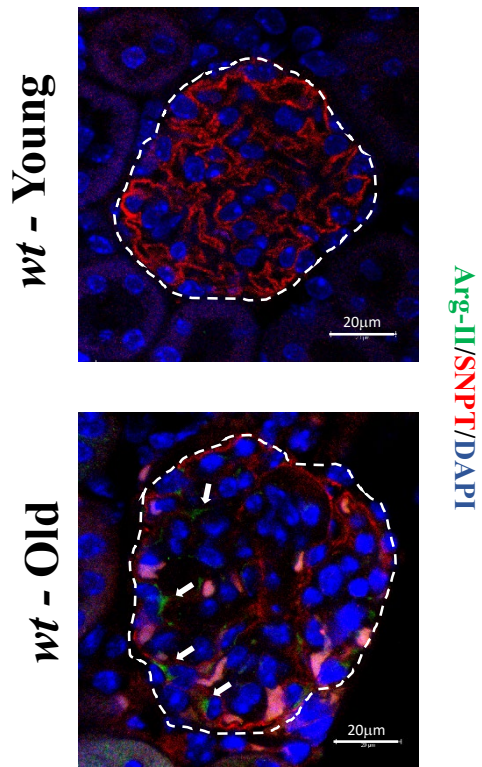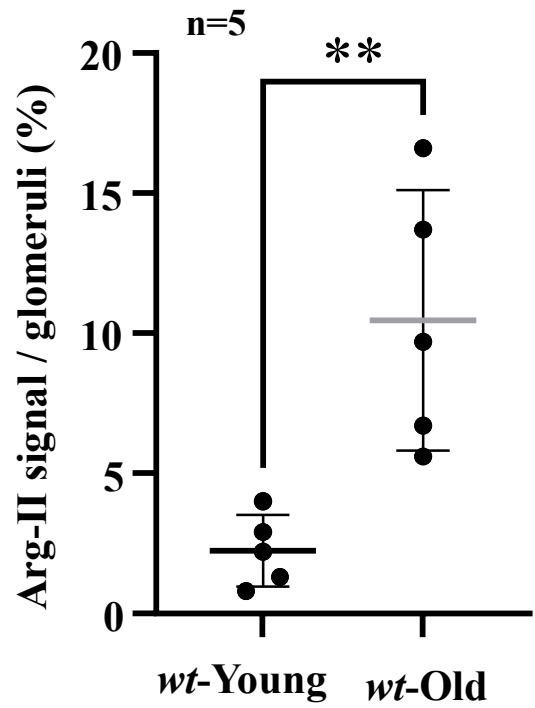

Suppl. Figure S7

Supplement: s1 [file s1]

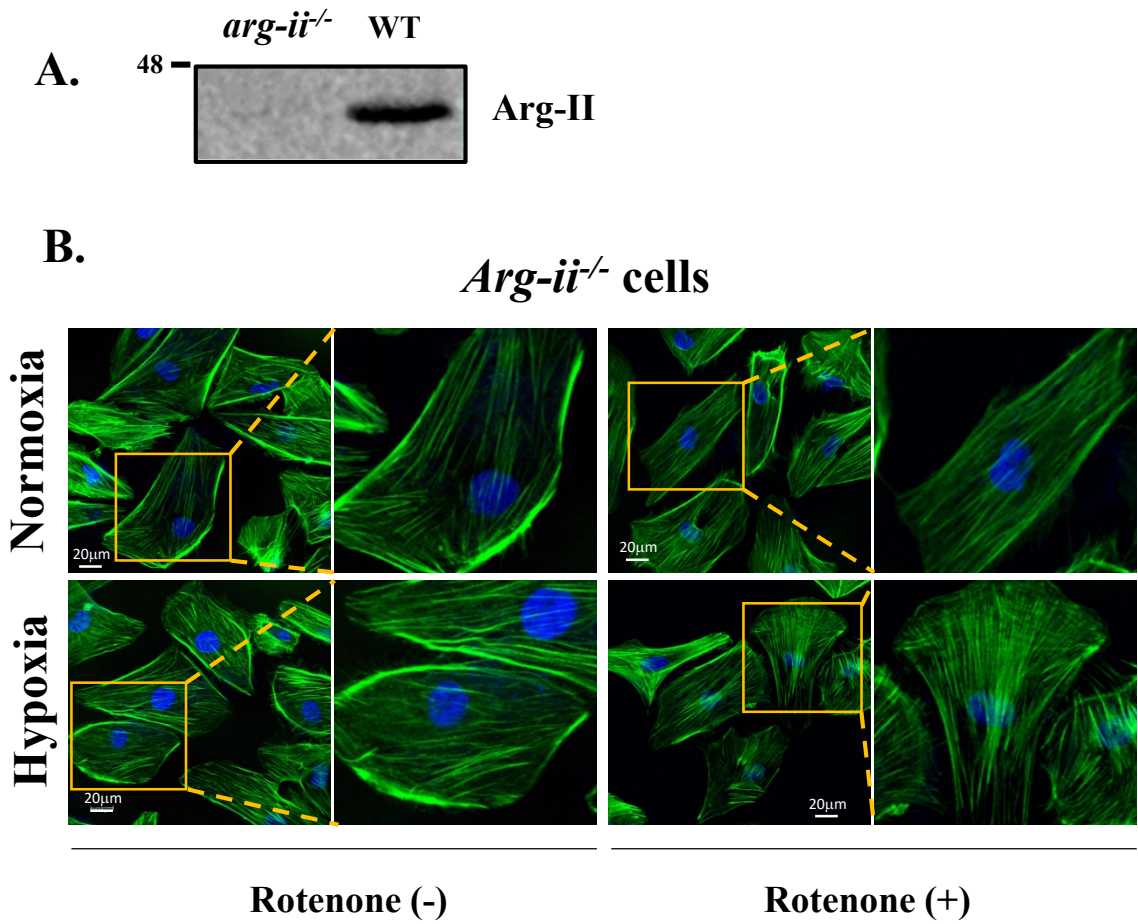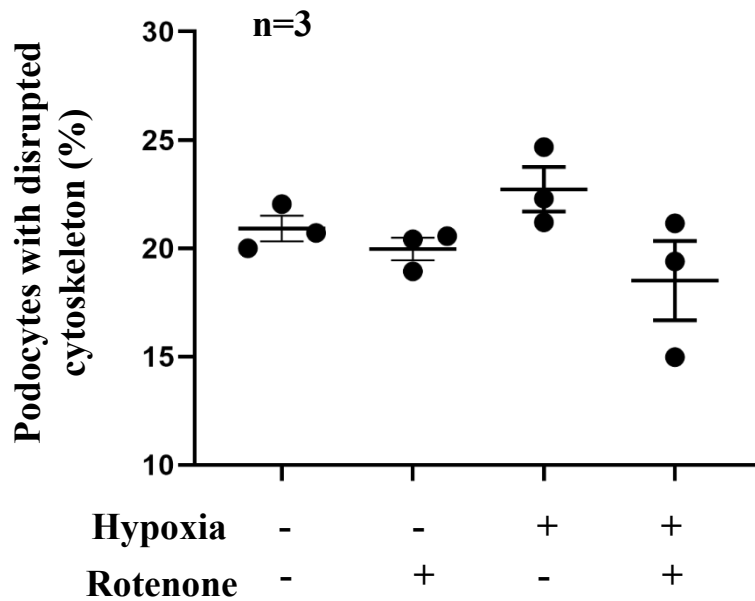

Suppl. Figure S5

Supplement: s1 [file s1]

**A**

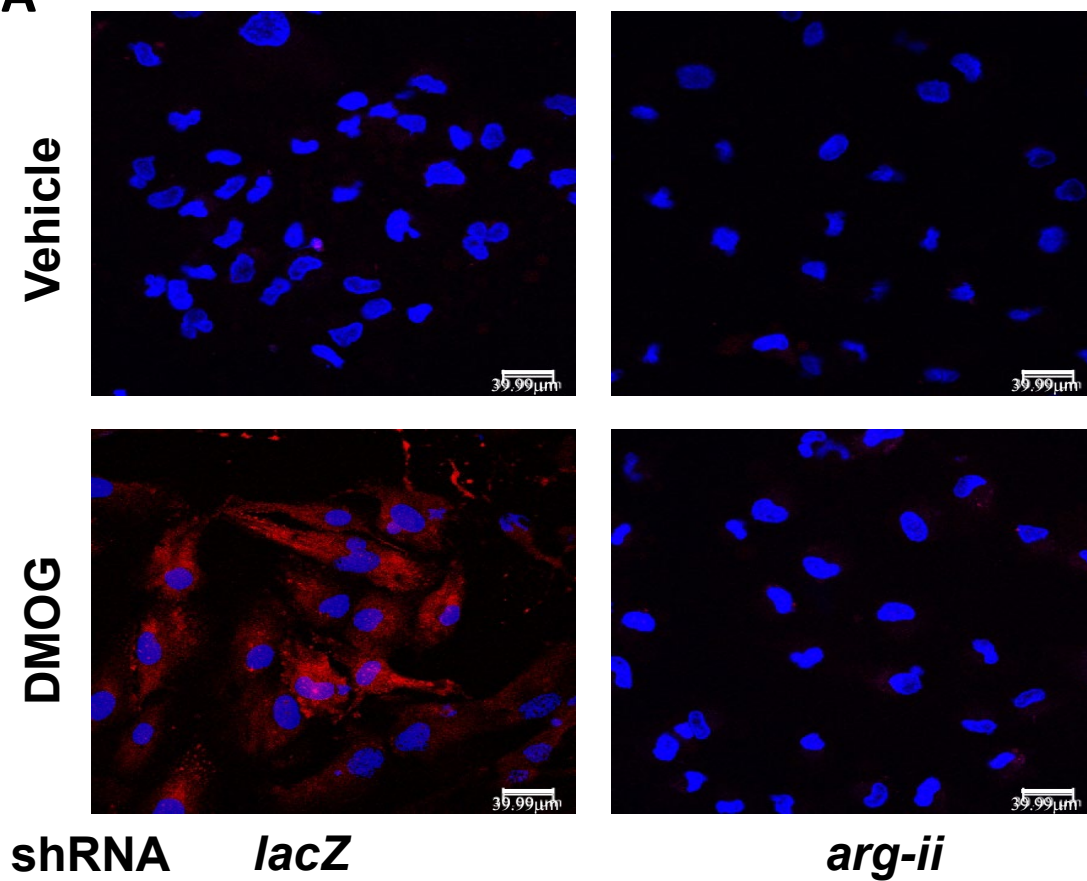

**B**

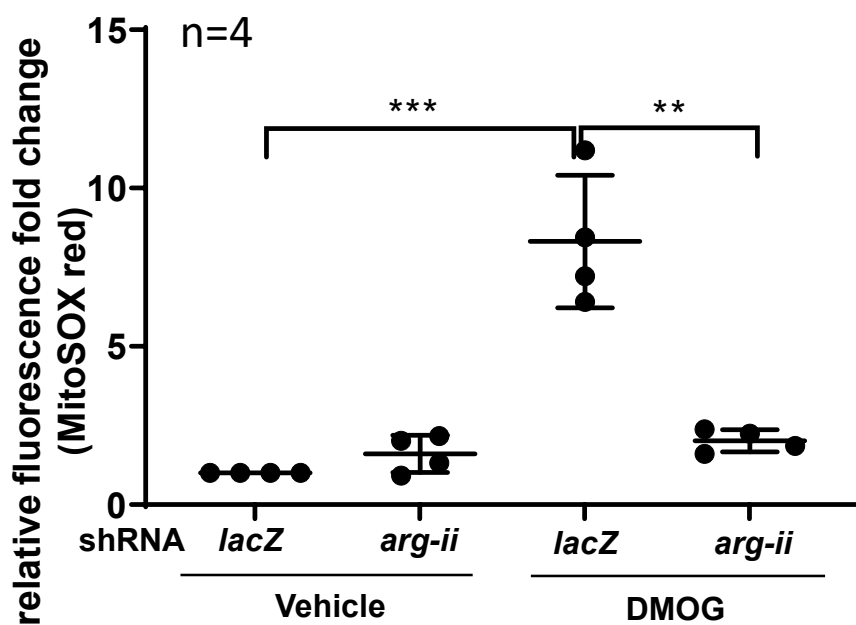

Suppl. Figure S4

Supplement: s1 [file s1]

**A**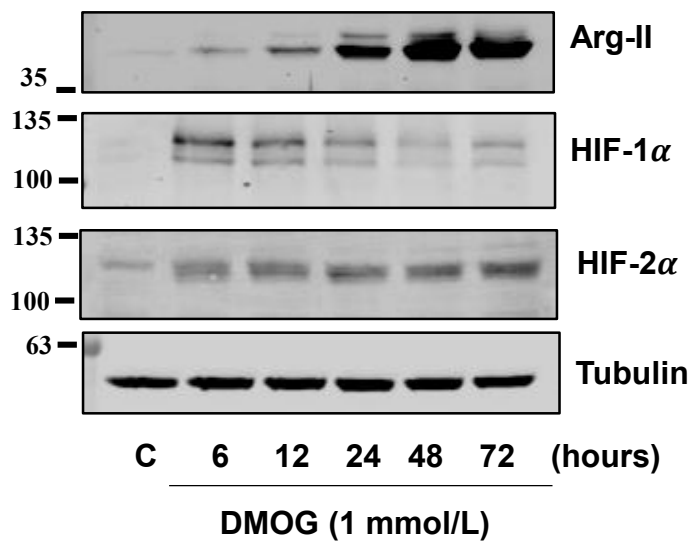**B**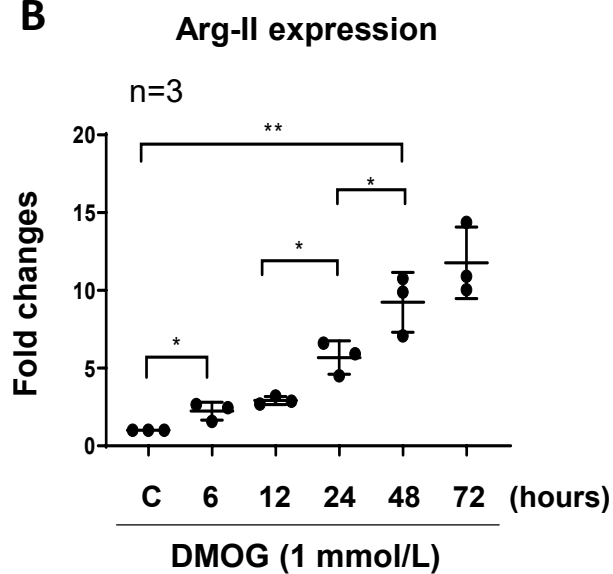**C**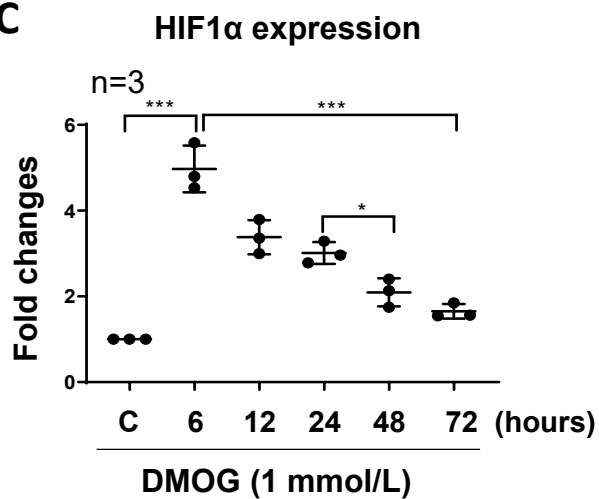**D**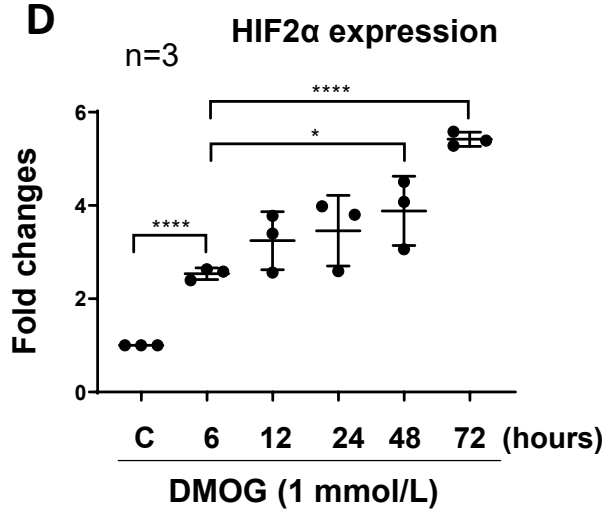

Suppl. Figure S1

Supplement: s1 [file s1]
